# Supplementary material
Source: publisher site journal article supplement (https://static.cambridge.org/content/id/urn:cambridge.org:id:article:S0897654619000133/resource/name/S0897654619000133supp001.pdf)
Supplement: Supplementary file 1 [file S0897654619000133supp001.pdf]

## URUGUAY BODY WORN CAMERAS EXPERIMENT – SURVEY INSTRUMENT

[translated from Spanish]

Internal: case number: \_\_\_\_\_

BWCs present in case: yes / no

### **PREAMBLE**

Dear Sir/Madam,

My name is [Name]. I work with the Ministry of Interior. It's nothing to worry about. I understand that you were recently stopped by a traffic agent and we are keen to obtain your feedback about the interaction with the traffic officer. I only have a few questions it will only take 2 minutes.

I would like to get some feedback about the conversation you had with the officer on [DATE]? I would like to find out how you felt about the time you spent with the officer and what if anything we could do to improve the service we deliver.

**Could you please confirm that you were the driver at the time?**

If no – I understand. If this is the case, then may I speak to the person who drove your vehicle?

If not, than say Very well, sir/madam. I appreciate your time today and have a good day.

If yes/this is the driver – I want to let you know first that all information will be anonymous and confidential. None of the information you provide can be linked to you.

We greatly appreciate your help with this study!

### **SECTION A**

**Was the officer wearing a video camera?**

No / Yes / I do not remember [if no, do not ask Section C]

**How satisfied were you with the way the police officer/agent spoke to you?**

Very satisfied   Quite satisfied   Neither satisfied nor unsatisfied   Quite unsatisfied   Very unsatisfied

**How safe did you feel when the police officer spoke to you?**

Very safe   Quite safe   Neither safe nor unsafe   Not very safe   Very unsafe

## **SECTION B**

Drivers who are stopped by the police often have different views about how police handle traffic violations. I am going to read out a series of short statements, and after each statement I will ask for you to indicate how much it reflects your views about how your case was handled.

**The police did not listen to what I had to say before making a decision.**

Strongly Disagree   Disagree   Agree   Strongly Agree

**I was treated the same way any other driver would have been treated.**

Strongly Disagree   Disagree   Agree   Strongly Agree

**The officer explained fully what would happen after stopping me.**

Strongly Disagree   Disagree   Agree   Strongly Agree

**I was treated with respect.**

Strongly Disagree   Disagree   Agree   Strongly Agree

**The police showed a concern for my wellbeing.**

Strongly Disagree   Disagree   Agree   Strongly Agree

**The decisions of the officer were based on the facts of the case, not personal biases.**

Strongly Disagree   Disagree   Agree   Strongly Agree

## SECTION C

In this section, I have a series of statements about police use of body-worn cameras. I will read out each of the statements, and then ask how much you agree or disagree with each of the statements. Please, there is no wrong or right response. I am only interested in your views.

**Body-worn videos (BWC) improved the transparency in the officer's handling of my case.**

Strongly Disagree   Disagree   Agree   Strongly Agree

**The use of BWC invaded my privacy.**

Strongly Disagree   Disagree   Agree   Strongly Agree

**BWCs are just a tool for the police to track people like me.**

Strongly Disagree   Disagree   Agree   Strongly Agree

**BWCs will protect officers against false allegations of misconduct.**

Strongly Disagree   Disagree   Agree   Strongly Agree

**BWCs ensured greater accountability in the officer's handling of my case.**

Strongly Disagree   Disagree   Agree   Strongly Agree

**Using BWC improved my trust in the police.**

Strongly Disagree   Disagree   Agree   Strongly Agree

**BWCs will help to prevent misconduct among officers.**

Strongly Disagree   Disagree   Agree   Strongly Agree

**BWCs will protect me against false allegations by the officer in future.**

Strongly Disagree   Disagree   Agree   Strongly Agree

**Has the officer asked you to pay the ticket “on the spot”?**

Yes

No

**Finally, how would you rate the overall interaction you have with the traffic officer?**

Very good

Good

Not good nor bad

Bad

Very bad

Read this to both groups: **Thank you very much for your time today, Sir/Madam. Is there anything else you wish to let us know?**

---

**Have a nice day**
